# Supplementary material for: Robust Demographic Inference from Genomic and SNP Data
Source: PLOS journal article supplement (doi:10.1371/journal.pgen.1003905), 2013-10-24
Supplement: S3 (10.1371/journal.pgen.1003905.s003) [file journal.pgen.1003905.s003]

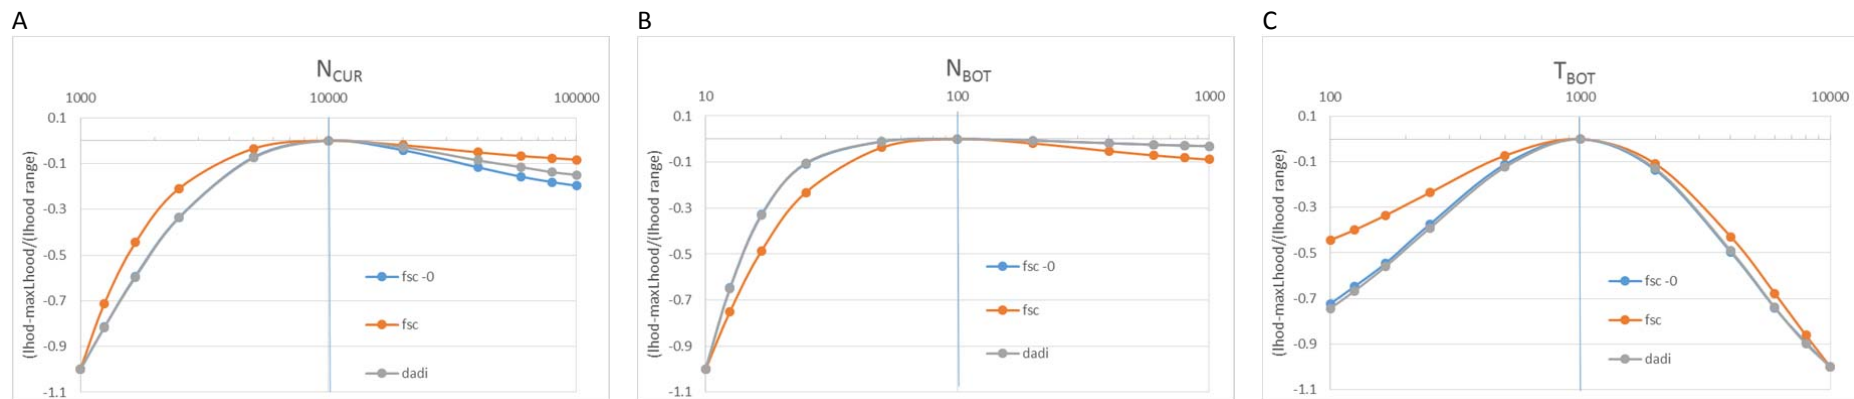

**Figure S3:**
